# Supplementary material for: Sustainable Process for Tortilla Production Using Ohmic Heating with Minimal Impact on the Nutritional Value, Protein, and Calcium Performance
Source: MDPI journal article supplement (doi:10.3390/foods12183327), 2023-09-05
Supplement: s1 [file s1]

## Sustainable process for tortillas production using ohmic heating with minimal impact on their nutritional value, protein, and calcium performance

Aurea K. Ramírez-Jiménez<sup>1a</sup>, Rubén Cota-López<sup>2a</sup>, Eduardo Morales-Sanchez<sup>2</sup>, Marcela Gaytán-Martínez<sup>3\*</sup>, Héctor Eduardo Martínez-Flores<sup>4</sup>, María de la Luz Reyes-Vega<sup>5</sup>, Juan de Dios Figueroa-Cardenas <sup>6</sup>

**Table S1.** Formulation of the experimental diets containing corn flour and tortillas.

| Ingredient (g/kg) | CD  | RC  | CT  | TPT | OHT |
|-------------------|-----|-----|-----|-----|-----|
| Starch            | 535 | 45  | -   | 19  | -   |
| Sucrose           | 100 | 100 | 94  | 100 | -   |
| Casein            | 200 | -   | -   | -   | -   |
| Cellulose         | 50  | -   | -   | -   | -   |
| Soybean oil       | 70  | 15  | 29  | 24  | 23  |
| Minerals          | 35  | 25  | 24  | 23  | 21  |
| Vitamins          | 10  | 10  | 10  | 10  | 10  |
| RC                | -   | 805 | -   | -   | -   |
| CT                | -   | -   | 843 | -   | -   |
| TPT               | -   | -   | -   | 824 | -   |
| OHT               | -   | -   | -   | -   | 946 |

CD: Casein diet; RC: raw corn flour; CT: commercial tortillas; TPT: traditional process tortillas; OHT: tortillas processed by ohmic heating.
